# Supplementary material for: Temperature responsive polymer brushes grafted from graphene oxide: an efficient fluorescent sensing platform for 2,4,6-trinitrophenol
Source: Royal Society of Chemistry journal article supplement (doi:10.1039/c6tc00898d), 2016-01-01
Supplement: c6tc00898d1.pdf [file c6tc00898d1.pdf]

## Electronic supplementary information for

### Temperature responsive polymer brushes grafted from graphene oxide: an efficient fluorescent sensing platform for 2,4,6-trinitrophenol

Yajiao Song, Jianhua Lü, Bingxin Liu and Changli Lü

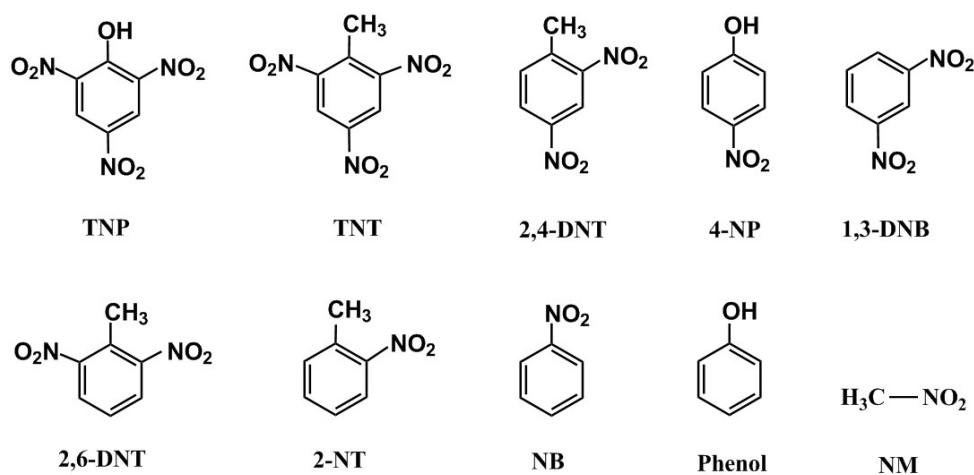

**Scheme S1** Structures of different nitro-compounds used in the experiments.

#### Calculation of fluorescence quenching efficiency

The fluorescence quenching efficiency ( $\eta$ ) for each analyte was calculated by the following equation:

$$\eta = (I_0 - I) / I_0 \times 100 \%$$

in which  $I_0$  and  $I$  are the fluorescence intensities in the absence and presence of analyte, respectively.

**Table S1** A comparative study of the  $K_{sv}$ , detection limit and medium used for TNP detection of some recent representative reports.

| Publication                                                 | Material used                                                | $K_{sv}(M^{-1})$  | Detection limit | Medium Used                     |
|-------------------------------------------------------------|--------------------------------------------------------------|-------------------|-----------------|---------------------------------|
| Present work                                                | Alq <sub>3</sub> -containing Block copolymer brush-GO hybrid | $5.5 \times 10^8$ | 2.38 nM         | H <sub>2</sub> O                |
| <i>Anal. Chem.</i> , <b>2012</b> , 84, 8415                 | Alq <sub>3</sub> nanospheres                                 | $1.4 \times 10^7$ | 32.3 nM         | Phosphate buffer solution       |
| <i>Chem. Eur. J.</i> , <b>2016</b> , 22, 2012               | Vinylpyridine Appended anthracene derivatives                | $4.3 \times 10^4$ | 500 ppb         | THF                             |
| <i>Sensors and Actuators B</i> , <b>2016</b> , 230, 746     | Small fluorescent molecule                                   | $7.0 \times 10^4$ | 0.47 $\mu$ M    | THF                             |
| <i>Cryst. Growth Des.</i> , <b>2016</b> , 16, 842           | Metal-organic framework                                      | $4.0 \times 10^4$ | 0.18 $\mu$ M    | EtOH                            |
| <i>Chem. Eur. J.</i> , <b>2016</b> , 22, 4931               | Covalent Triazine Framework                                  | $8.0 \times 10^5$ | –               | H <sub>2</sub> O/EtOH (v/v=4:1) |
| <i>Chem. Commun.</i> , <b>2015</b> , 51, 7201               | Conjugated polyelectrolyte                                   | $1.0 \times 10^7$ | 128 ppb         | H <sub>2</sub> O                |
| <i>ACS Appl. Mater. Interfaces</i> , <b>2014</b> , 6, 10722 | Graphene oxide                                               | $1.3 \times 10^5$ | 125 ppb         | Buffer                          |
| <i>Chem. Mater.</i> , <b>2014</b> , 26, 4221                | Graphene derivative                                          | $8.9 \times 10^5$ | 300 ppb         | H <sub>2</sub> O/THF (v/v=9:1)  |
| <i>Chem. Commun.</i> , <b>2014</b> , 50, 15788              | Organic cage                                                 | $2.2 \times 10^5$ | 6.4 ppb         | DCM                             |
| <i>Chem. Eur. J.</i> , <b>2014</b> , 20, 12215              | $\alpha$ -Cyanostilbene derivative                           | $3.3 \times 10^5$ | 0.28 $\mu$ M    | H <sub>2</sub> O/THF (v/v=7:3)  |

## Calculation of Detection Limit

The detection limit plot for TNP was obtained by plotting change in the fluorescence intensity vs the concentration of TNP. The curve demonstrated a linear relationship and the correlation coefficient ( $R^2$ ) via linear regression analysis was calculated to be 0.99. The limit of detection (LOD) was then calculated using the equation  $3\sigma/K$ , where  $\sigma$  denotes the standard deviation for the intensity of sensing system in the absence of TNP and was calculated for the peak intensity value using ‘Statistics on Columns’ option in origin software and verified with online calculator. K represents slope of the equation.

$$\begin{aligned}\text{LOD} &= 3\sigma/K \\ &= 3 \times 2427.1 / (3.05 \times 10^{13}) \\ &= 2.38 \times 10^{-9} \text{M}\end{aligned}$$

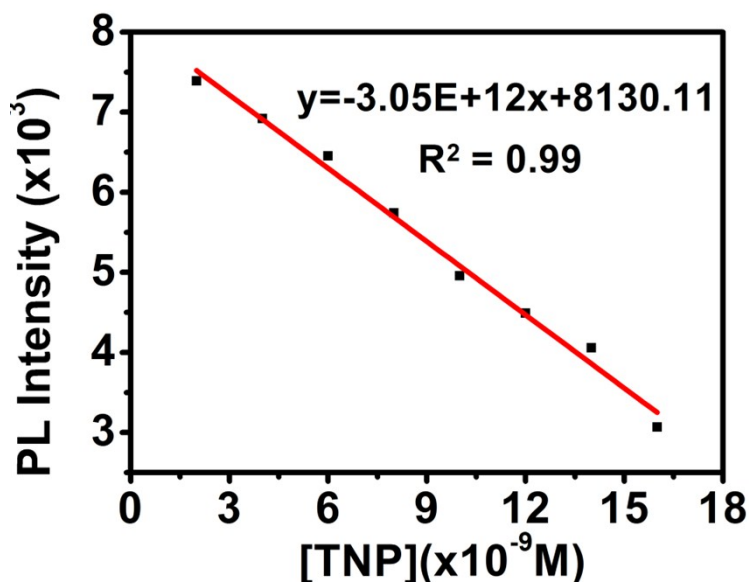

**Fig.S1** Relation of PL intensity against the concentration of TNP and linear fit for estimation of detection limit.

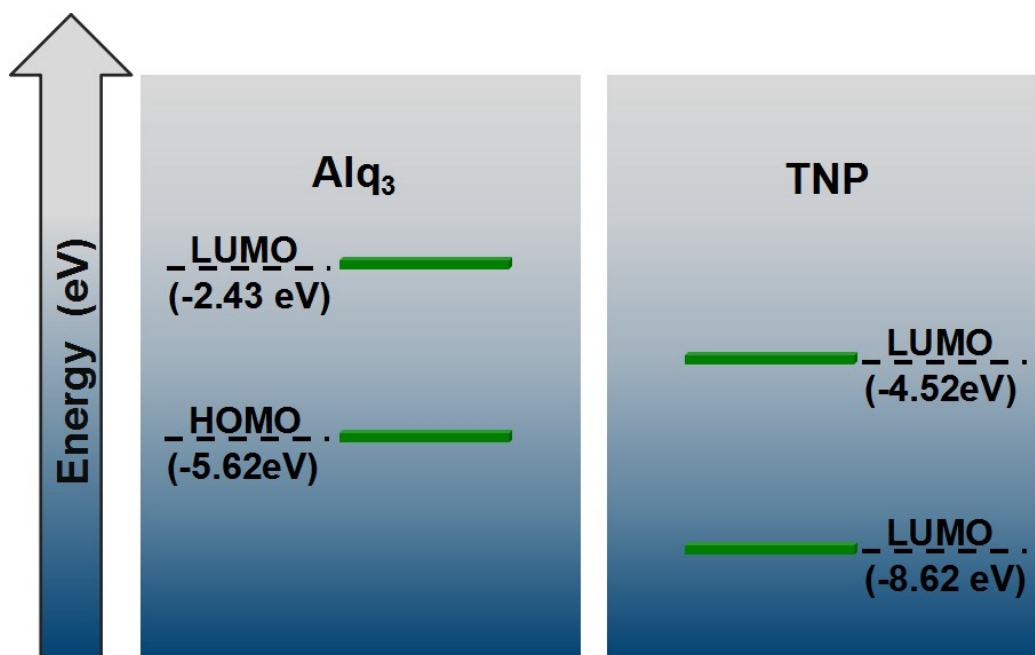

**Fig.S2** Calculated energy diagram of Alq<sub>3</sub> and TNP (the calculated energy data come from the reported literatures 43, 48 and 50).

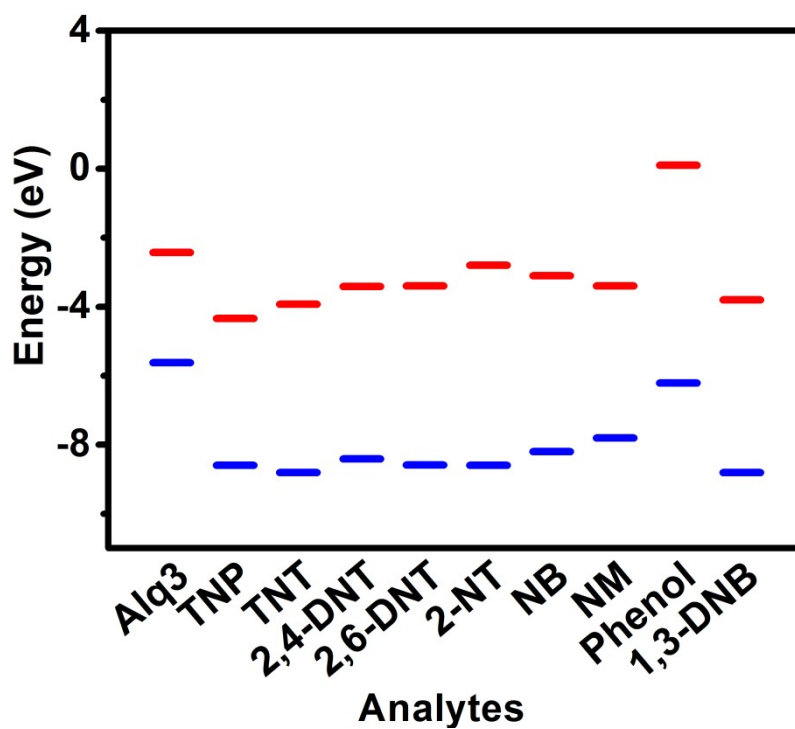

**Fig.S3** HOMO and LUMO energies for Alq<sub>3</sub> and selected analytes (the calculated energy data come from the reported literatures 48, 50).
